# Supplementary material for: Detection of Volatile Metabolites Derived from Garlic (Allium sativum) in Human Urine
Source: PubMed Central journal article supplement (PMC5192449; doi:10.3390/metabo6040043), 2016-12-01
Supplement: metabolites-06-00043-s001.pdf [file metabolites-06-00043-s001.pdf]

# Supplementary Materials: Detection of Volatile Metabolites Derived from Garlic (*Allium sativum*) in Human Urine

Laura Scheffler, Yvonne Sauermann, Anja Heinlein, Constanze Sharapa and Andrea Buettner

**Table S1.** Determined flavor dilution (FD) factors of AMS in different urine sample sets g to n as determined via HRGC-O using a DB-5 capillary. Six to nine samples per set were collected at different time intervals before and after ingestion of 3 g of raw garlic from different volunteers. "Pre" relates to the urine sample that was collected prior to garlic consumption. "0.5 h post" to "24 h post" relate to the urine samples that were obtained after garlic consumption.

| sample     | Urine g | Urine h | Urine i | Urine j | Urine k | Urine l | Urine m | Urine n |
|------------|---------|---------|---------|---------|---------|---------|---------|---------|
| pre        | n.d.    | n.d.    | n.d.    | n.d.    | n.d.    | n.d.    | n.d.    | n.d.    |
| 0.5 h post | 8       | 4       | 8       | 4       | 8       | 8       | 8       | 8       |
| 1 h post   | 32      | 8       | 32      | 16      | 8       | 8       | 8       | 8       |
| 2 h post   | 8       | 8       | 16      | 8       | 16      | 8       | -       | 16      |
| 3 h post   | -       | -       | -       | -       | 4       | 8       | 32      | -       |
| 4 h post   | 8       | 8       | 16      | 4       | 16      | 8       | 32      | 16      |
| 6 h post   | 8       | 8       | 16      | 2       | 8       | 8       | 32      | n.d.    |
| 8 h post   | n.d.    | 8       | 16      | n.d.    | 16      | 4       | -       | -       |
| 24 h post  | n.d.    | 2       | n.d.    | n.d.    | n.d.    | n.d.    | -       | -       |

n.d. not detected; - no sample was provided at this time point.

**Table S2.** Compilation of investigated urine samples: time of urine sampling, as well as mass (g), volume (mL) and creatinine content (mmol/L) of the investigated sample; DMTS and DMDS-concentrations are given in area/kg and area/mmol creatinine.

|         | Sample     | Time (h) | Mass (g) | Volume (mL) | Creatinine (mmol/L) | DMTS      |                        | DMDS      |                        |
|---------|------------|----------|----------|-------------|---------------------|-----------|------------------------|-----------|------------------------|
|         |            |          |          |             |                     | (area/kg) | (area/mmol creatinine) | (area/kg) | (area/mmol creatinine) |
| urine a | pre        | 0.00     | 53.1486  |             |                     | 5926.8    |                        | 0.0       |                        |
|         | 2 h post   | 2.17     | 50.1150  |             |                     | 5547.2    |                        | 18497.5   |                        |
|         | 4 h post   | 4.08     | 49.5297  |             |                     | 9408.5    |                        | 1221872.9 |                        |
|         | 6 h post   | 5.83     | 55.6357  |             |                     | 21874.4   |                        | 73100.5   |                        |
| urine b | pre        | 0.00     | 18.2110  |             | 1.67                | 0.0       | 0.0 *                  | 110043.4  | 65894.2 *              |
|         | 2 h post   | 2.08     | 26.0446  |             | 1.75                | 0.0       | 0.0 *                  | 68689.9   | 39251.4 *              |
|         | 4 h post   | 3.67     | 37.1800  |             | 1.47                | 28294.8   | 19248.2 *              | 467670.8  | 318143.4 *             |
|         | 6 h post   | 6.58     | 54.3923  |             | 2.62                | 315154.9  | 120288.1 *             | 3538791.3 | 1350683.7 *            |
|         | 8 h post   | 7.75     | 49.5103  |             | 1.47                | 82346.5   | 56018.0 *              | 251624.4  | 171173.1 *             |
|         | 12 h post  | 12.12    | 61.7643  |             | 3.91                | 9973.4    | 2550.7 *               | 326078.3  | 83396.0 *              |
|         | 21 h post  | 21.08    | 38.1209  |             | 9.89                | 106214.7  | 10739.6 *              | 723461.4  | 73150.8 *              |
|         | 24 h post  | 24.08    | 50.4667  |             | 3.08                | 19577.3   | 6356.3 *               | 671868.8  | 218139.2 *             |
| urine c | pre        | 0.00     | 39.6450  | 39.2        | 5.96                | 30319.1   | 5143.4                 | 198713.6  | 33710.1                |
|         | 0.5 h post | 0.63     | 49.9958  | 50.0        | 1.11                | 7280.6    | 6544.4                 | 110969.3  | 99747.5                |
|         | 1 h post   | 1.08     | 19.9021  | 50.0        | 0.57                | 158224.5  | 110309.7               | 284844.3  | 198585.4               |
|         | 2 h post   | 1.95     | 49.9436  | 50.0        | 0.66                | 11873.4   | 18038.0                | 179282.2  | 272365.1               |
|         | 4 h post   | 3.78     | 50.3893  | 50.0        | 2.60                | 21492.7   | 8340.9                 | 149496.0  | 58016.5                |
|         | 6 h post   | 5.75     | 50.5265  | 50.0        | 3.88                | 79582.0   | 20723.9                | 304652.0  | 79334.4                |
|         | 8 h post   | 8.13     | 50.2804  | 50.0        | 3.13                | 45007.6   | 14438.7                | 199501.2  | 64001.1                |
|         | 24 h post  | 24.15    | 50.743   | 50.0        | 7.31                | 122066.1  | 16955.5                | 479711.5  | 66634.1                |

Table S2. Cont.

|         | Sample     | Time (h) | Mass (g) | Volume (mL) | Creatinine (mmol/L) | DMTS      |                        | DMDS      |                        |
|---------|------------|----------|----------|-------------|---------------------|-----------|------------------------|-----------|------------------------|
|         |            |          |          |             |                     | (area/kg) | (area/mmol creatinine) | (area/kg) | (area/mmol creatinine) |
| urine d | pre        | 0.00     | 50.1570  | 50.0        | 3.81                | 15331.9   | 4034.1                 | 45596.8   | 11997.5                |
|         | 0.5 h post | 0.47     | 49.8599  | 50.0        | 1.13                | 7380.7    | 6498.8                 | 36141.3   | 31823.0                |
|         | 1 h post   | 1.05     | 49.9479  | 50.0        | 1.63                | 11532.0   | 7067.9                 | 42364.1   | 25964.7                |
|         | 2 h post   | 2.13     | 49.9834  | 50.0        | 1.74                | 6082.0    | 3493.4                 | 21607.2   | 12410.7                |
|         | 4 h post   | 4.00     | 50.5099  | 50.0        | 5.64                | 30964.2   | 5550.7                 | 276322.1  | 49533.6                |
|         | 6 h post   | 5.75     | 50.5739  | 50.0        | 5.17                | 92498.3   | 18110.6                | 270495.3  | 52961.3                |
|         | 8 h post   | 7.52     | 50.0155  | 50.0        | 1.82                | 15475.2   | 8492.0                 | 78395.7   | 43019.4                |
|         | 24 h post  | 24.92    | 50.019   | 50.0        | 2.40                | 19052.8   | 7929.7                 | 113396.9  | 47195.5                |
| urine e | pre        | 0.00     | 50.0938  | 50.0        | 0.93                | 15251.4   | 16346.5                | 38607.6   | 41379.8                |
|         | 0.5 h post | 0.77     | 49.9007  | 50.0        | 0.85                | 17154.1   | 20161.1                | 7815.5    | 9185.5                 |
|         | 1 h post   | 1.45     | 49.8642  | 50.0        | 0.74                | 17627.9   | 23887.8                | 11531.3   | 15626.3                |
|         | 2 h post   | 2.25     | 49.9592  | 50.0        | 1.39                | 0.0       | 0.0                    | 6585.4    | 4746.5                 |
|         | 4 h post   | 3.88     | 50.0838  | 50.0        | 2.04                | 2775.3    | 1364.1                 | 20665.4   | 10157.1                |
|         | 6 h post   | 5.72     | 50.0233  | 50.0        | 1.81                | 5017.7    | 2773.2                 | 42900.0   | 23710.3                |
|         | 8 h post   | 7.88     | 50.2255  | 50.0        | 3.09                | 5077.1    | 1652.6                 | 45494.8   | 14809.0                |
|         | 24 h post  | 24.68    | 50.0227  | 50.0        | 1.78                | 40801.5   | 22917.1                | 121504.8  | 68246.1                |
| urine f | pre        | 0.00     | 32.5189  | 32.0        | 14.31               | 24693.3   | 1753.0                 | 202005.6  | 14340.7                |
|         | 0.5 h post | 0.55     | 49.9647  | 50.0        | 2.99                | 0.0       | 0.0                    | 48534.3   | 16193.9                |
|         | 1 h post   | 1.03     | 49.8430  | 50.0        | 0.95                | 0.0       | 0.0                    | 0.0       | 0.0                    |
|         | 2 h post   | 2.03     | 49.9875  | 50.0        | 1.74                | 0.0       | 0.0                    | 0.0       | 0.0                    |
|         | 4 h post   | 4.07     | 50.0798  | 50.0        | 3.92                | 57528.2   | 14690.2                | 94848.6   | 24220.3                |
|         | 6 h post   | 6.02     | 50.3908  | 50.0        | 6.78                | 146296.5  | 21756.1                | 379533.6  | 56441.2                |
|         | 8 h post   | 8.05     | 50.503   | 50.0        | 6.94                | 0.0       | 0.0                    | 0.0       | 0.0                    |
|         | 24 h post  | 24.68    | 39.7167  | 39.0        | 14.10               | 0.0       | 0.0                    | 33512.4   | 2421.0                 |
| urine g | pre        | 0.00     | 50.1354  | 50.0        | 4.31                | 19128.2   | 4450.3                 | 124363.2  | 28934.1                |
|         | 0.5 h post | 1.12     | 49.8514  | 50.0        | 1.18                | 5917.6    | 4989.2                 | 33860.6   | 28548.6                |
|         | 1 h post   | 1.73     | 49.9335  | 50.0        | 1.22                | 4846.4    | 3951.9                 | 24272.3   | 19792.2                |
|         | 2 h post   | 2.92     | 50.0587  | 50.0        | 3.96                | 60988.4   | 15433.2                | 0.0       | 0.0                    |
|         | 4 h post   | 4.67     | 49.9454  | 50.0        | 2.47                | 33296.4   | 13480.8                | 0.0       | 0.0                    |
|         | 6 h post   | 6.92     | 50.8932  | 50.0        | 12.82               | 289331.4  | 22977.5                | 686751.9  | 54539.0                |
|         | 8 h post   | 7.83     | 6.8311   | 6.0         | 15.86               | 0.0       | 0.0                    | 0.0       | 0.0                    |
|         | 24 h post  | 24.53    | 18.411   | 18.0        | 18.94               | 0.0       | 0.0                    | 0.0       | 0.0                    |
| urine h | pre        | 0.00     | 10.1392  | 10.0        | 15.17               | 44086.3   | 2947.1                 | 890405.6  | 59522.8                |
|         | 0.5 h post | 1.02     | 49.9072  | 50.0        | 1.05                | 44342.3   | 42111.3                | 0.0       | 0.0                    |
|         | 1 h post   | 1.73     | 49.9145  | 50.0        | 0.75                | 67555.5   | 90030.4                | 0.0       | 0.0                    |
|         | 2 h post   | 2.92     | 49.8837  | 50.0        | 0.84                | 0.0       | 0.0                    | 0.0       | 0.0                    |
|         | 4 h post   | 4.82     | 49.7932  | 50.0        | 0.94                | 0.0       | 0.0                    | 0.0       | 0.0                    |
|         | 6 h post   | 6.92     | 49.798   | 50.0        | 1.49                | 7630.8    | 5112.9                 | 0.0       | 0.0                    |
|         | 8 h post   | 7.83     | 50.1232  | 50.0        | 6.10                | 16479.4   | 2709.7                 | 0.0       | 0.0                    |
|         | 24 h post  | 23.63    | 50.024   | 50.0        | 2.08                | 32784.3   | 15778.2                | 0.0       | 0.0                    |
| urine i | pre        | 0.00     | 19.3317  | 19.0        | 22.94               | 19656.8   | 871.8                  | 87524.6   | 3881.8                 |
|         | 0.5 h post | 0.92     | 34.5982  | 34.0        | 19.15               | 22631.2   | 1202.3                 | 130324.7  | 6923.5                 |
|         | 1 h post   | 1.50     | 26.2297  | 25.8        | 14.51               | 53069.6   | 3717.4                 | 204729.8  | 14341.0                |
|         | 2 h post   | 2.73     | 35.5222  | 35.0        | 12.07               | 43775.4   | 3680.6                 | 107285.0  | 9020.5                 |
|         | 4 h post   | 4.62     | 33.5814  | 33.0        | 12.31               | 29480.6   | 2436.4                 | 120870.5  | 9989.4                 |
|         | 6 h post   | 6.67     | 50.6976  | 50.0        | 9.10                | 19843.1   | 2209.9                 | 95507.5   | 10636.4                |
|         | 8 h post   | 7.45     | 43.5456  | 43.0        | 10.10               | 16810.0   | 1685.0                 | 38442.5   | 3853.5                 |
|         | 24 h post  | 23.88    | 15.5162  | 15.2        | 37.11               | 63546.5   | 1748.0                 | 163313.2  | 4492.4                 |

Table S2. Cont.

|           | Sample     | Time (h) | Mass (g) | Volume (mL) | Creatinine (mmol/L) | DMTS      |                        | DMDS      |                        |
|-----------|------------|----------|----------|-------------|---------------------|-----------|------------------------|-----------|------------------------|
|           |            |          |          |             |                     | (area/kg) | (area/mmol creatinine) | (area/kg) | (area/mmol creatinine) |
| urine j   | pre        | 0.00     | 50.7676  | 50.0        | 11.79               | 12409.5   | 1068.8                 | 76564.6   | 6594.2                 |
|           | 0.5 h post | 0.53     | 49.9728  | 50.0        | 0.80                | 0.0       | 0.0                    | 9465.1    | 11755.4                |
|           | 1 h post   | 1.03     | 49.9724  | 50.0        | 0.66                | 16088.9   | 24442.0                | 10265.7   | 15595.4                |
|           | 2 h post   | 2.07     | 50.0155  | 50.0        | 1.37                | 0.0       | 0.0                    | 13535.8   | 9850.8                 |
|           | 4 h post   | 4.12     | 40.2985  | 40.0        | 7.45                | 15509.3   | 2096.2                 | 33524.8   | 4531.1                 |
|           | 6 h post   | 6.03     | 50.1150  | 50.0        | 2.76                | 0.0       | 0.0                    | 0.0       | 0.0                    |
|           | 8 h post   | 7.78     | 50.0429  | 50.0        | 1.17                | 0.0       | 0.0                    | 8952.3    | 7626.9                 |
|           | 24 h post  | 24.12    | 45.8566  | 45.0        | 20.84               | 35087.6   | 1715.6                 | 135683.8  | 6634.4                 |
| urine k   | pre        | 0.00     | 50.0446  | 50.0        | 5.75                | 5475.1    | 952.3                  | 41083.4   | 7146.0                 |
|           | 0.5 h post | 0.77     | 50.0027  | 50.0        | 2.29                | 2319.9    | 1013.1                 | 7739.6    | 3379.8                 |
|           | 1 h post   | 1.30     | 49.9764  | 50.0        | 3.07                | 3421.6    | 1113.2                 | 4202.0    | 1367.1                 |
|           | 2 h post   | 2.33     | 49.9929  | 50.0        | 2.96                | 3220.5    | 1086.5                 | 17262.5   | 5823.8                 |
|           | 3 h post   | 3.35     | 49.9729  | 50.0        | 2.90                | 0.0       | 0.0                    | 32117.4   | 11054.2                |
|           | 4 h post   | 4.38     | 50.0049  | 50.0        | 5.03                | 0.0       | 0.0                    | 47935.3   | 9536.3                 |
|           | 6 h post   | 6.22     | 49.9742  | 50.0        | 5.08                | 0.0       | 0.0                    | 5422.8    | 1066.1                 |
|           | 8 h post   | 7.92     | 50.2461  | 50.0        | 11.01               | 17653.1   | 1611.8                 | 49794.9   | 4546.4                 |
| 24 h post | 23.80      | 50.2049  | 50.0     | 7.43        | 0.0                 | 0.0       | 22069.6                | 2982.3    |                        |
| urine l   | pre        | 0.00     | 51.2038  | 50.0        | 41.00               | 17811.2   | 444.9                  | 151883.3  | 3793.7                 |
|           | 0.5 h post | 0.75     | 39.7135  | 39.0        | 25.03               | 51393.1   | 2090.8                 | 224759.8  | 9143.7                 |
|           | 1 h post   | 1.30     | 50.0618  | 50.0        | 4.09                | 0.0       | 0.0                    | 57828.5   | 14159.8                |
|           | 2 h post   | 2.33     | 50.0743  | 50.0        | 5.47                | 12860.9   | 2354.6                 | 92262.9   | 16891.6                |
|           | 3 h post   | 3.12     | 50.0046  | 50.0        | 3.32                | 2819.7    | 850.6                  | 30177.2   | 9103.6                 |
|           | 4 h post   | 4.33     | 50.2867  | 50.0        | 12.32               | 15590.6   | 1272.5                 | 212123.7  | 17314.0                |
|           | 6 h post   | 6.20     | 50.8602  | 50.0        | 27.19               | 36531.5   | 1366.9                 | 175382.7  | 6562.1                 |
|           | 8 h post   | 7.90     | 50.9033  | 50.0        | 23.54               | 22513.3   | 973.8                  | 126593.0  | 5475.5                 |
| 24 h post | 26.05      | 30.5201  | 30.0     | 28.57       | 21821.7             | 777.1     | 36664.4                | 1305.7    |                        |
| urine m   | pre        | 0.00     | 50.0039  | 50.0        | 2.45                | 11839.1   | 4841.5                 | 75174.1   | 30741.6                |
|           | 0.5 h post | 0.77     | 49.9662  | 50.0        | 1.80                | 10166.9   | 5636.6                 | 132809.8  | 73630.6                |
|           | 1 h post   | 1.42     | 49.8828  | 50.0        | 1.53                | 6856.1    | 4479.5                 | 126416.3  | 82595.7                |
|           | 3 h post   | 2.67     | 50.3904  | 50.0        | 5.22                | 53204.6   | 10264.4                | 479456.4  | 92497.9                |
|           | 4 h post   | 3.75     | 40.5086  | 40.0        | 7.81                | 79785.5   | 10342.1                | 375821.4  | 48715.5                |
|           | 6 h post   | 5.92     | 50.7212  | 50.0        | 10.27               | 24644.5   | 2434.4                 | 181502.0  | 17929.1                |
| urine n   | pre        | 0.00     | 35.7715  | 35.0        | 16.70               | 39388.9   | 2410.3                 | 71537.4   | 4377.6                 |
|           | 0.5 h post | 1.00     | 30.6561  | 30.0        | 13.53               | 22997.1   | 1736.8                 | 51148.1   | 3862.9                 |
|           | 1 h post   | 1.50     | 30.0953  | 30.0        | 2.60                | 22927.2   | 8838.1                 | 41136.0   | 15857.3                |
|           | 2 h post   | 2.67     | 50.1476  | 50.0        | 3.68                | 7218.7    | 1969.0                 | 22732.9   | 6200.9                 |
|           | 4 h post   | 4.37     | 45.8559  | 45.0        | 16.86               | 27193.9   | 1643.2                 | 139022.5  | 8400.5                 |
|           | 6 h post   | 6.50     | 37.8167  | 37.0        | 19.77               | 55055.0   | 2846.6                 | 90832.9   | 4696.5                 |

\* Calculated under the assumption 1 mL urine equals 1 g urine.







Table S3. Cont.

|                | Sample        | Time (h) | Mass (g) | Volume (mL) | Creatinine (mmol/L) | AMS       |                        | AMSO      |            | AMSO <sub>2</sub>      |           |
|----------------|---------------|----------|----------|-------------|---------------------|-----------|------------------------|-----------|------------|------------------------|-----------|
|                |               |          |          |             |                     | (area/kg) | (area/mmol creatinine) | (area/kg) | (area/kg)  | (area/mmol creatinine) | (area/kg) |
| <i>urine n</i> | <i>pre</i>    | 0.00     | 50.0039  | 50.0        | 2.45                | 0         | 0.0                    | 0         | 0.0        | 0.0                    | 0.0       |
|                | 0.5 h post    | 0.77     | 49.9662  | 50.0        | 1.80                | 26798     | 14857.1                | 9463304   | 5251620.4  | 1499653.8              | 831417.9  |
|                | 1 h post      | 1.42     | 49.8828  | 50.0        | 1.53                | 26983     | 17629.8                | 9136842   | 5978242.4  | 2256268.7              | 1474161.1 |
|                | 3 h post      | 2.67     | 50.3904  | 50.0        | 5.22                | 31315     | 6041.5                 | 9744504   | 1872355.3  | 2856119.4              | 551009.3  |
|                | 4 h post      | 3.75     | 40.5086  | 40.0        | 7.81                | 19280     | 2499.1                 | 7362093   | 944506.8   | 3156391.5              | 409144.3  |
|                | 6 h post      | 5.92     | 50.7212  | 50.0        | 10.27               | 28450     | 2810.3                 | 4316870   | 415547.9   | 2930037.1              | 289433.7  |
|                | garlic intake | 0.08     |          |             |                     |           |                        |           |            |                        |           |
| <i>urine n</i> | <i>pre</i>    | 0.00     | 35.7715  | 35.0        | 16.70               | 4389      | 268.6                  | 958473    | 44307.0    | 1004402.9              | 61462.0   |
|                | 0.5 h post    | 1.00     | 30.6561  | 30.0        | 13.53               | 9231      | 697.2                  | 7076406   | 534442.5   | 1336471.4              | 100936.4  |
|                | 1 h post      | 1.50     | 30.0953  | 30.0        | 2.60                | 23027     | 8876.5                 | 26998435  | 10407496.1 | 4058241.7              | 1564391.9 |
|                | 2 h post      | 2.67     | 50.1476  | 50.0        | 3.68                | 54399     | 14838.6                | 18852767  | 5142488.3  | 4426971.6              | 1207549.5 |
|                | 4 h post      | 4.37     | 45.8559  | 45.0        | 16.86               | 77177     | 4663.4                 | 12180875  | 736032.5   | 4719392.7              | 285170.5  |
|                | 6 h post      | 6.50     | 37.8167  | 37.0        | 19.77               | 21525     | 1112.9                 | 5720991   | 295801.4   | 3612240.1              | 186769.3  |
|                | garlic intake | 0.50     |          |             |                     |           |                        |           |            |                        |           |

\* calculated under the assumption 1 mL urine equals 1 g urine.

Table S4. Dietary record—test person b.

|              |            | Food                                                                                | Beverages           |
|--------------|------------|-------------------------------------------------------------------------------------|---------------------|
| DAY 1        | break-fast | porridge with coconut blossom sugar                                                 | coffee, juice       |
|              | S1         |                                                                                     |                     |
|              | lunch      | pizza with salami and ham                                                           | water, cola, coffee |
|              | S2         |                                                                                     |                     |
|              | dinner     | croissants                                                                          | juice               |
|              | S3         |                                                                                     |                     |
| DAY 2        | break-fast |                                                                                     | coffee, juice       |
|              | S1         |                                                                                     |                     |
|              | lunch      | pizza with salami and ham                                                           | water               |
|              | S2         |                                                                                     |                     |
|              | dinner     | pasta with pepper, pesto, cream                                                     | tea with honey      |
|              | S3         |                                                                                     |                     |
| SAMPLING DAY | break-fast | “Alnatura Frühstücksbrei” (porridge, spelt, rice (puffed), linseed, different nuts) | coffee, water       |
|              | S1         |                                                                                     |                     |
|              | lunch      | panini with tomato and mozzarella                                                   | tea                 |
|              | S2         |                                                                                     |                     |
|              | dinner     | pasta with cream sauce                                                              | water, tea          |
|              | S3         |                                                                                     |                     |

S1, S2, S3: Snacks.



Table S5. Dietary record—test person c.

|              |                | Food                                        | Beverages         |
|--------------|----------------|---------------------------------------------|-------------------|
|              |                | break-f<br>ast                              | breakfast cereals |
| DAY 1        | S1             | cookies                                     | tea               |
|              | lunch          | pretzel, roll with turkey, cheese and salad |                   |
|              | S2             | apple, cake                                 |                   |
|              | dinner         | rice with tomato, egg                       |                   |
|              | S3             |                                             |                   |
|              | break-f<br>ast | toast                                       | tea               |
| DAY 2        | S1             | cookies                                     |                   |
|              | lunch          | roll with ham, cucumber, orange             | tea               |
|              | S2             | apple, cookies                              |                   |
|              | dinner         | salad, cutlet, orange                       |                   |
|              | S3             |                                             |                   |
|              | break-f<br>ast | toast                                       | milky coffee      |
| SAMPLING DAY | S1             | cookies                                     |                   |
|              | lunch          | salad (ewe's cheese, olives), bread         |                   |
|              | S2             | muffin                                      |                   |
|              | dinner         | cutlet, egg, orange                         |                   |
|              | S3             |                                             |                   |

S1, S2, S3: Snacks.

Table S6. Dietary record—test person d.

|              |            | Food                                                                                             | Beverages                             |
|--------------|------------|--------------------------------------------------------------------------------------------------|---------------------------------------|
|              |            | break-fast                                                                                       |                                       |
| DAY 1        | S1         |                                                                                                  |                                       |
|              | lunch      | roll with mild, full-fat cheese, tomato                                                          | water                                 |
|              | S2         | 2 truffels                                                                                       |                                       |
|              | dinner     | scrambled eggs with pepper and basil,<br>2 slices of sunflower-bread                             | water, orange spritzer, Fanta classic |
|              | S3         | apple cake                                                                                       |                                       |
|              | break-fast |                                                                                                  | water                                 |
| DAY 2        | S1         |                                                                                                  |                                       |
|              | lunch      | bagel with cream cheese and rocket,<br>orange, chocolate bar with milk-filling<br>(Kinderriegel) | water                                 |
|              | S2         | spelt-chocolate-cookie                                                                           |                                       |
|              | dinner     | pizza                                                                                            | water, orange spritzer                |
|              | S3         |                                                                                                  |                                       |
|              | break-fast | chocolate-cereal                                                                                 | water, apple spritzer                 |
| SAMPLING DAY | S1         |                                                                                                  |                                       |
|              | lunch      | turkey-egg-round flat bread                                                                      | water, apple spritzer                 |
|              | S2         | rhubarb-pie                                                                                      |                                       |
|              | dinner     | pasta with ham                                                                                   | water, lemonade                       |
|              | S3         |                                                                                                  |                                       |

S1, S2, S3: Snacks.

Table S7. Dietary record—test person e.

|              |            | Food                                                               | Beverages   |
|--------------|------------|--------------------------------------------------------------------|-------------|
|              |            | break-fast                                                         | cereal      |
| DAY 1        | S1         |                                                                    |             |
|              | lunch      | bratwurst, mustard, horseradish                                    | water       |
|              | S2         |                                                                    |             |
|              | dinner     | pasta with salmon, tomato and escallion                            | water       |
|              | S3         | pancake with chocolate, banana                                     |             |
|              | break-fast | chocolate muffin, half and half cookie                             | coffee      |
| DAY 2        | S1         |                                                                    |             |
|              | lunch      |                                                                    | water, cola |
|              | S2         |                                                                    |             |
|              | dinner     | pancake, omelet with pepper                                        | cacao       |
|              | S3         |                                                                    |             |
|              | break-fast | peach, cereal                                                      | coffee      |
| SAMPLING DAY | S1         |                                                                    |             |
|              | lunch      | panini with tomato and mozzarella, granary bread with cream cheese | water       |
|              | S2         |                                                                    |             |
|              | dinner     | pasta with vegetables, soy cream                                   | water       |
|              | S3         |                                                                    |             |

S1, S2, S3: Snacks.

Table S8. Dietary record—test person f.

|              |            | Food                                                                                         | Beverages                        |
|--------------|------------|----------------------------------------------------------------------------------------------|----------------------------------|
| DAY 1        | break-fast | bread with Nutella, tea sausage spread<br>chocolate-cream-dessert<br>rockmelon               | cappuccino, water, orange juice  |
|              | S1         |                                                                                              |                                  |
|              | lunch      | naan bread au naturel with cheese, ham<br>and rocket<br>bread with sausage, meat salad       | orange spritzer                  |
|              | S2         | nut roll                                                                                     | coffee with milk                 |
|              | dinner     | bread with meat salad, sausage, cheese                                                       | Iso grapefruit (lemonade), water |
|              | S3         | chocolate-oat-cookie                                                                         |                                  |
| DAY 2        | break-fast | toast with cheese, ham, jam, Nutella                                                         | coffee, orange spritzer          |
|              | S1         | chocolate-oat-cookie                                                                         | water                            |
|              | lunch      | -                                                                                            |                                  |
|              | S2         |                                                                                              |                                  |
|              | dinner     | sushi (artichoke, salmon, cucumber, carrot,<br>sprouts, peanut), wasabi, ginger, soy sauce   | orange spritzer                  |
|              | S3         | brownie with vanilla ice-cream                                                               | cider, Guinness, water           |
| SAMPLING DAY | break-fast | (after garlic-intake)<br>prezel with pumpkin seeds,<br>croissante with nut-nougat croissante | coffee with milk, water          |
|              | S1         |                                                                                              | water                            |
|              | lunch      | sandwich tomato/mozzarella<br>sushi with smoked salmon                                       | coffee with milk, water          |
|              | S2         | donuts (raspberry, chocolate, nut)                                                           | coffee                           |
|              | dinner     | sandwich with cheese, rocket, bacon                                                          | water, passion fruit spritzer    |
|              | S3         | cheeseburger, chickenburger (McDonalds)                                                      | water                            |

S1, S2, S3: Snacks.

Table S9. Dietary record—test person g.

|              |            | Food                                                                                              | Beverages                |
|--------------|------------|---------------------------------------------------------------------------------------------------|--------------------------|
| DAY 1        | break-fast | -                                                                                                 | coffee                   |
|              | S1         |                                                                                                   |                          |
|              | lunch      | roll with poppy seed                                                                              | water                    |
|              | S2         |                                                                                                   |                          |
|              | dinner     | yoghurt (mango, passion fruit)                                                                    | water                    |
|              | S3         | vanilla ice cream with red fruit jelly                                                            | water                    |
| DAY 2        | break-fast | -                                                                                                 | coffee                   |
|              | S1         |                                                                                                   |                          |
|              | lunch      | Wrap with olives and feta cheese (no garlic!)                                                     | fruit-buttermilk, water  |
|              | S2         |                                                                                                   |                          |
|              | dinner     | buffalo mozzarella with tomato and olive oil<br>baguette with olives                              | white wine, water<br>tea |
|              | S3         |                                                                                                   |                          |
| SAMPLING DAY | break-fast | yoghurt                                                                                           | coffee, water            |
|              | S1         |                                                                                                   |                          |
|              | lunch      | champignon, parmesan cheese, olive oil, ham, baguette with butter                                 | water                    |
|              | S2         | Cornetto lemon (ice cream)                                                                        | Fanta                    |
|              | dinner     | champignon, parmesan cheese, olive oil, mozzarella, tomato, ham, baguette with butter;<br>yoghurt | water                    |
|              | S3         |                                                                                                   |                          |

S1, S2, S3: Snacks.

Table S10. Dietary record—test person h.

|              |            | Food                                                                           | Beverages                      |
|--------------|------------|--------------------------------------------------------------------------------|--------------------------------|
|              |            |                                                                                |                                |
| DAY 1        | break-fast | -                                                                              | water                          |
|              | S1         |                                                                                |                                |
|              | lunch      | bread (with butter)                                                            | water                          |
|              | S2         |                                                                                |                                |
|              | dinner     | salad (tomato, cucumber, pepper, ewe's cheese, olives), buttered bread         | water, alcohol-free wheat beer |
|              | S3         | Raffaello                                                                      |                                |
| DAY 2        | break-fast | -                                                                              | lemon tea (instant)            |
|              | S1         |                                                                                |                                |
|              | lunch      | tomato/ mozzarella with balsamic vinegar and oil, bread                        | water                          |
|              | S2         |                                                                                | coffee with milk               |
|              | dinner     | flasky pastries with tomato, feta, olives and basil                            | beer                           |
|              | S3         |                                                                                |                                |
| SAMPLING DAY | break-fast | bread with cream cheese and cucumber                                           | water                          |
|              | S1         |                                                                                | water                          |
|              | lunch      | flasky pastries with tomato, feta, olives and basil                            | water                          |
|              | S2         |                                                                                | water                          |
|              | dinner     | salad with cucumber, tomato and mozzarella, bread with cream cheese and cheese | water                          |
|              | S3         |                                                                                |                                |

S1, S2, S3: Snacks.

Table S11. Dietary record—test person i.

|              |                | Food                                   | Beverages   |
|--------------|----------------|----------------------------------------|-------------|
| DAY 1        | break-f<br>ast | peanut butter, Nutella and bread       | coffee      |
|              | S1             |                                        | tea         |
|              | lunch          | pasta with mushroom sauce,<br>fruits   | tea         |
|              | S2             | fruits                                 |             |
|              | dinner         | goulash soup, fruits                   | tea         |
|              | S3             |                                        | tea         |
| DAY 2        | break-f<br>ast | peanut butter and bread, fruits        | coffee      |
|              | S1             |                                        |             |
|              | lunch          | pasta with vegetables and tomato sauce | tea, coffee |
|              | S2             | fruits                                 |             |
|              | dinner         | chicken breast and eggs, fruits        | tea         |
|              | S3             |                                        |             |
| SAMPLING DAY | break-f<br>ast | bread and cheese, fruits               | coffee      |
|              | S1             |                                        |             |
|              | lunch          | bread and cheese, fruits               | tea, coffee |
|              | S2             |                                        |             |
|              | dinner         | pasta with tomato sauce, fruits        | tea         |
| S3           |                |                                        |             |

S1, S2, S3: Snacks.

Table S12. Dietary record—test person j.

|              |            | Food                                                         | Beverages                |
|--------------|------------|--------------------------------------------------------------|--------------------------|
| DAY 1        | break-fast | chocolate crisped rice with milk                             | coffee                   |
|              | S1         |                                                              |                          |
|              | lunch      | pasta with cherry sauce                                      | water                    |
|              | S2         | ice cream with chocolate and nuts                            | coffee                   |
|              | dinner     | cucumber, pepper, tomato, cheese, sausage and roll           | water                    |
|              | S3         |                                                              |                          |
| DAY 2        | break-fast | chocolate croissante                                         | coffee                   |
|              | S1         |                                                              |                          |
|              | lunch      | 2 Leberkäse roll with pickled cucumber, 1 ½ blueberry muffin | water                    |
|              | S2         | 1 butter biscuit                                             |                          |
|              | dinner     | pasta with paprika pesto and tomatoes, 1 berry-smoothie      | water                    |
|              | S3         |                                                              |                          |
| SAMPLING DAY | break-fast | 1 banana                                                     | coffee, water with juice |
|              | S1         |                                                              | water with juice         |
|              | lunch      | pasta with paprika pesto and tomatoes, 1 blueberry muffin    | water with juice         |
|              | S2         | 1 piece of cake                                              | water with juice         |
|              | dinner     | gummi bears, potatoes with pepper cream cheese               |                          |
|              | S3         |                                                              |                          |

S1, S2, S3: Snacks.



Table S13. Dietary record—test person k.

|              |                | Food                                                 | Beverages                     |
|--------------|----------------|------------------------------------------------------|-------------------------------|
| DAY 1        | break-f<br>ast | soy yoghurt, pretzel breadstick with cheese          | coffee                        |
|              | S1             |                                                      |                               |
|              | lunch          | casserole with potatoes, carrots, paprika, mincemeat | Spezi (cola and lemonade mix) |
|              | S2             | poppy seed strudel                                   |                               |
|              | dinner         |                                                      | water with lime juice         |
|              | S3             |                                                      |                               |
| DAY 2        | break-f<br>ast | poppy seed strudel                                   | coffee                        |
|              | S1             |                                                      |                               |
|              | lunch          | casserole with potatoes, carrots, paprika, mincemeat | water                         |
|              | S2             |                                                      |                               |
|              | dinner         | risotto with paprika, tomato and peas                | water                         |
|              | S3             |                                                      |                               |
| SAMPLING DAY | break-f<br>ast | soy yoghurt                                          | coffee                        |
|              | S1             |                                                      |                               |
|              | lunch          | risotto with paprika, tomato and peas                | water                         |
|              | S2             | gummi bears                                          | Spezi (cola and lemonade mix) |
|              | dinner         | pizza margherita                                     | Punica, water                 |
|              | S3             | salt pretzel                                         |                               |

S1, S2, S3: Snacks.

Table S14. Dietary record—test person I.

|              |            | Food                                                 | Beverages                     |
|--------------|------------|------------------------------------------------------|-------------------------------|
| DAY 1        | break-fast | chocolate-vanilla pudding                            |                               |
|              | S1         | bread roll with bratwurst and mustard                | Spezi (cola and lemonade mix) |
|              | lunch      | casserole with potatoes, carrots, paprika, mincemeat | Spezi (cola and lemonade mix) |
|              | S2         |                                                      |                               |
|              | dinner     | roll with ham and cheese                             | apple spritzer                |
|              | S3         |                                                      |                               |
| DAY 2        | break-fast | poppy seed strudel                                   |                               |
|              | S1         |                                                      |                               |
|              | lunch      | casserole with potatoes, carrots, paprika, mincemeat | apple spritzer                |
|              | S2         |                                                      | coffee                        |
|              | dinner     | risotto with paprika, tomato and peas                | apple spritzer                |
|              | S3         |                                                      |                               |
| SAMPLING DAY | break-fast | granary bread with ham                               |                               |
|              | S1         |                                                      |                               |
|              | lunch      | risotto with paprika, tomato and peas                | Spezi (cola and lemonade mix) |
|              | S2         | gummi bears                                          | Spezi (cola and lemonade mix) |
|              | dinner     | pizza margherita                                     | Punica                        |
|              | S3         |                                                      |                               |

S1, S2, S3: Snacks.

Table S15. Dietary record—test person m.

|              |            | Food                                                                                     | Beverages                                                         |
|--------------|------------|------------------------------------------------------------------------------------------|-------------------------------------------------------------------|
| DAY 1        | break-fast | 3 slices rye-wheat bread, butter, Nutella, 2 apricots                                    | 1 tall cup of coffee with whole milk, 1 glass of ACE-spritzer     |
|              | S1         |                                                                                          | 2 glasses of water                                                |
|              | lunch      | polenta with stir-fried vegetables (zucchini, pepper, kohlrabi)                          | 1 glass of water                                                  |
|              | S2         | carrot, nectarine and banana                                                             | 2 glasses of water                                                |
|              | dinner     | 5 slices rye-wheat bread (1x with butter, 2x with liverwurst, 2x with cheese)            | 1 glass of water                                                  |
|              | S3         |                                                                                          | 2 glasses of water, 1 glass of currant spritzer                   |
| DAY 2        | break-fast | 3 slices rye-wheat bread, 1x liverwurst, 2x butter and marmalade, ½ apricot, ½ nectarine | 1 tall cup of coffee with whole milk, 1 glass of currant spritzer |
|              | S1         |                                                                                          | 1 glass of water, 1 glass of currant spritzer                     |
|              | lunch      | 3 slices rye-wheat bread with cheese, carrot                                             | 1 glass of water                                                  |
|              | S2         | nectarine, apricot, Hanuta                                                               | 2 glasses of water                                                |
|              | dinner     | whole-grain pasta with minced meat sauce (beef mince, tomato, pepper, peas), cheese      | 1 glass of water                                                  |
|              | S3         | Hanuta, 2 Kinder-Schoko-Bons                                                             | 1 glass of water, 1 glass of tonic                                |
| SAMPLING DAY | break-fast | 3 slices rye-wheat bread with Nutella, 1 apricot, ½ nectarine                            | 1 tall cup of coffee with whole milk, 2 glasses of water          |
|              | S1         |                                                                                          | 2 glasses of water, 1 glass of apple spritzer                     |
|              | lunch      | whole-grain pasta with minced meat sauce (beef mince, tomato, pepper, peas), cheese      | 1 glass of water                                                  |
|              | S2         | Hanuta                                                                                   | 1 small cup of coffee with milk, 1 glass of water                 |
|              | dinner     |                                                                                          |                                                                   |
|              | S3         |                                                                                          |                                                                   |

S1, S2, S3: Snacks.

Table S16. Dietary record—test person n.

|              |            | Food                                                                                                           | Beverages                                                      |
|--------------|------------|----------------------------------------------------------------------------------------------------------------|----------------------------------------------------------------|
| DAY 1        | break-fast | 3 slices rye-wheat bread                                                                                       | coffee with soy milk                                           |
|              | S1         |                                                                                                                |                                                                |
|              | lunch      | noodles with olive-tomato sauce (tomato purée, olives, basil, provençal herbs, olive oil, pizza soft cheese)   |                                                                |
|              | S2         | trail mix, gummi bears                                                                                         |                                                                |
|              | dinner     | hash browns with apple sauce                                                                                   |                                                                |
|              | S3         |                                                                                                                |                                                                |
| DAY 2        | break-fast | Alnatura breakfast puree with rice milk                                                                        | nursing tea (fenugreek, fennel, anise, caraway, lemon verbena) |
|              | S1         |                                                                                                                |                                                                |
|              | lunch      | eggplants with tomato sauce (according to the restaurant without onions and garlic, but with broth from Maggi) |                                                                |
|              | S2         |                                                                                                                |                                                                |
|              | dinner     | bread with margarine and ham, cucumber                                                                         |                                                                |
|              | S3         | dark chocolate                                                                                                 |                                                                |
| SAMPLING DAY | break-fast | vegan marble cake                                                                                              | coffee with soy milk, Fanta                                    |
|              | S1         |                                                                                                                |                                                                |
|              | lunch      | bread bun with butter, ham, tomato, cucumber                                                                   | water                                                          |
|              | S2         |                                                                                                                | water                                                          |
|              | dinner     |                                                                                                                |                                                                |
| S3           |            |                                                                                                                |                                                                |

S1, S2, S3: Snacks.

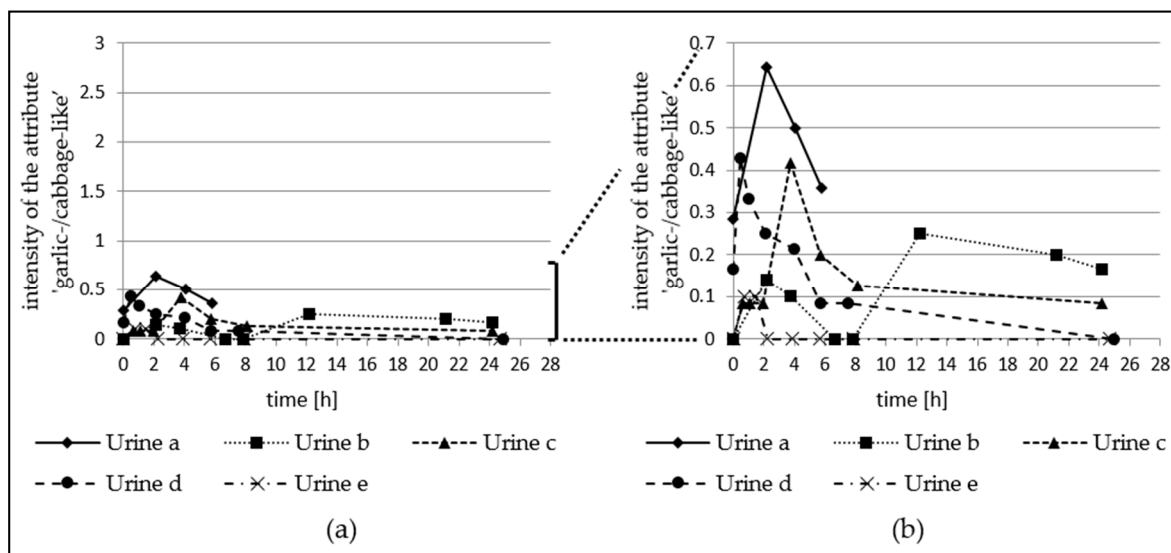

**Figure S1.** Perceived intensity of a "garlic-/cabbage-like" odor in urine at different intervals before and after ingestion of raw garlic. Up to eight samples were collected before and after ingestion of 30 g (Urine *a*) or 3 g (Urine *b–e*) of raw garlic from different volunteers, whereby sets *a*, *b* and *e* were provided by the same subject but on different days. The first time interval (0 h) corresponds with the urine sampled prior to garlic consumption. Panelists were asked to rate the attribute "garlic-/cabbage-like" on a scale from 0 (no perception) to 3 (strong perception). The values shown represent the mean intensity ratings from all panelists. (a): odor intensity on a scale for 0 to 3; (b): for better visualization the intensity is presented up to 0.7.

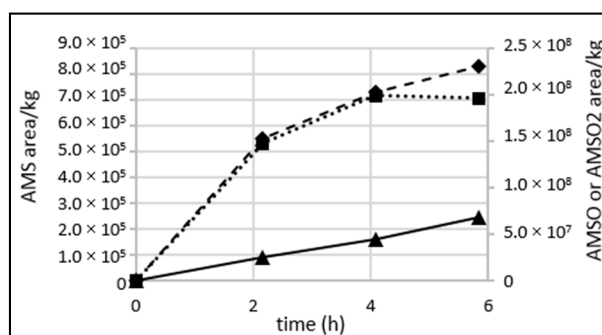

**Figure S2.** Time-resolved metabolite profiles of AMS, AMSO and AMSO<sub>2</sub> for urine set *a*. AMS (◆), AMSO (■), AMSO<sub>2</sub> (▲), time 0 h represents the urine sample collected prior to garlic consumption, subsequent time intervals represent urine samples after garlic consumption. Garlic was consumed 4 min after the first urine sample was collected.

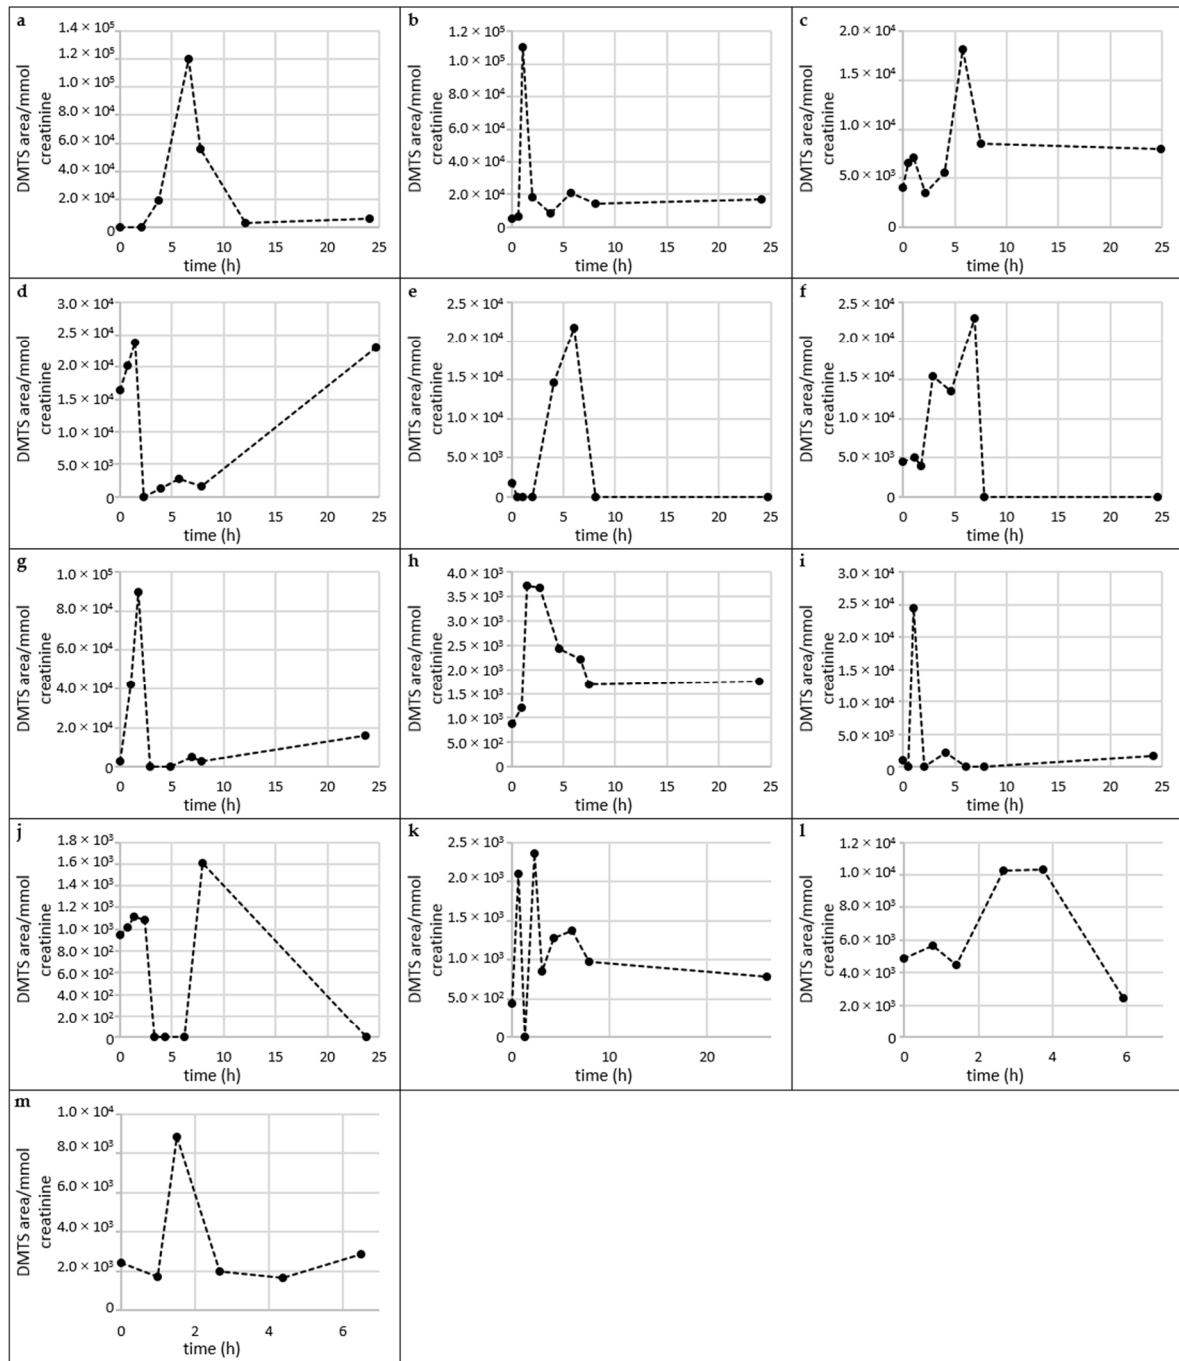

**Figure S3.** Time-resolved profiles of DMTS-excretion in urine for sets *b* to *n*. Time 0 h represents the urine sample collected prior the garlic consumption, following times represent urine samples after garlic consumption. Garlic was consumed 2 to 38 min after the first urine sample was given. (a) set *b*; (b) set *c*; (c) set *d*; (d) set *e*; (e) set *f* (f) set *g*; (g) set *h*; (h) set *i*; (i) set *j*; (j) set *k*; (k) set *l*; (l) set *m*; (m) set *n*.

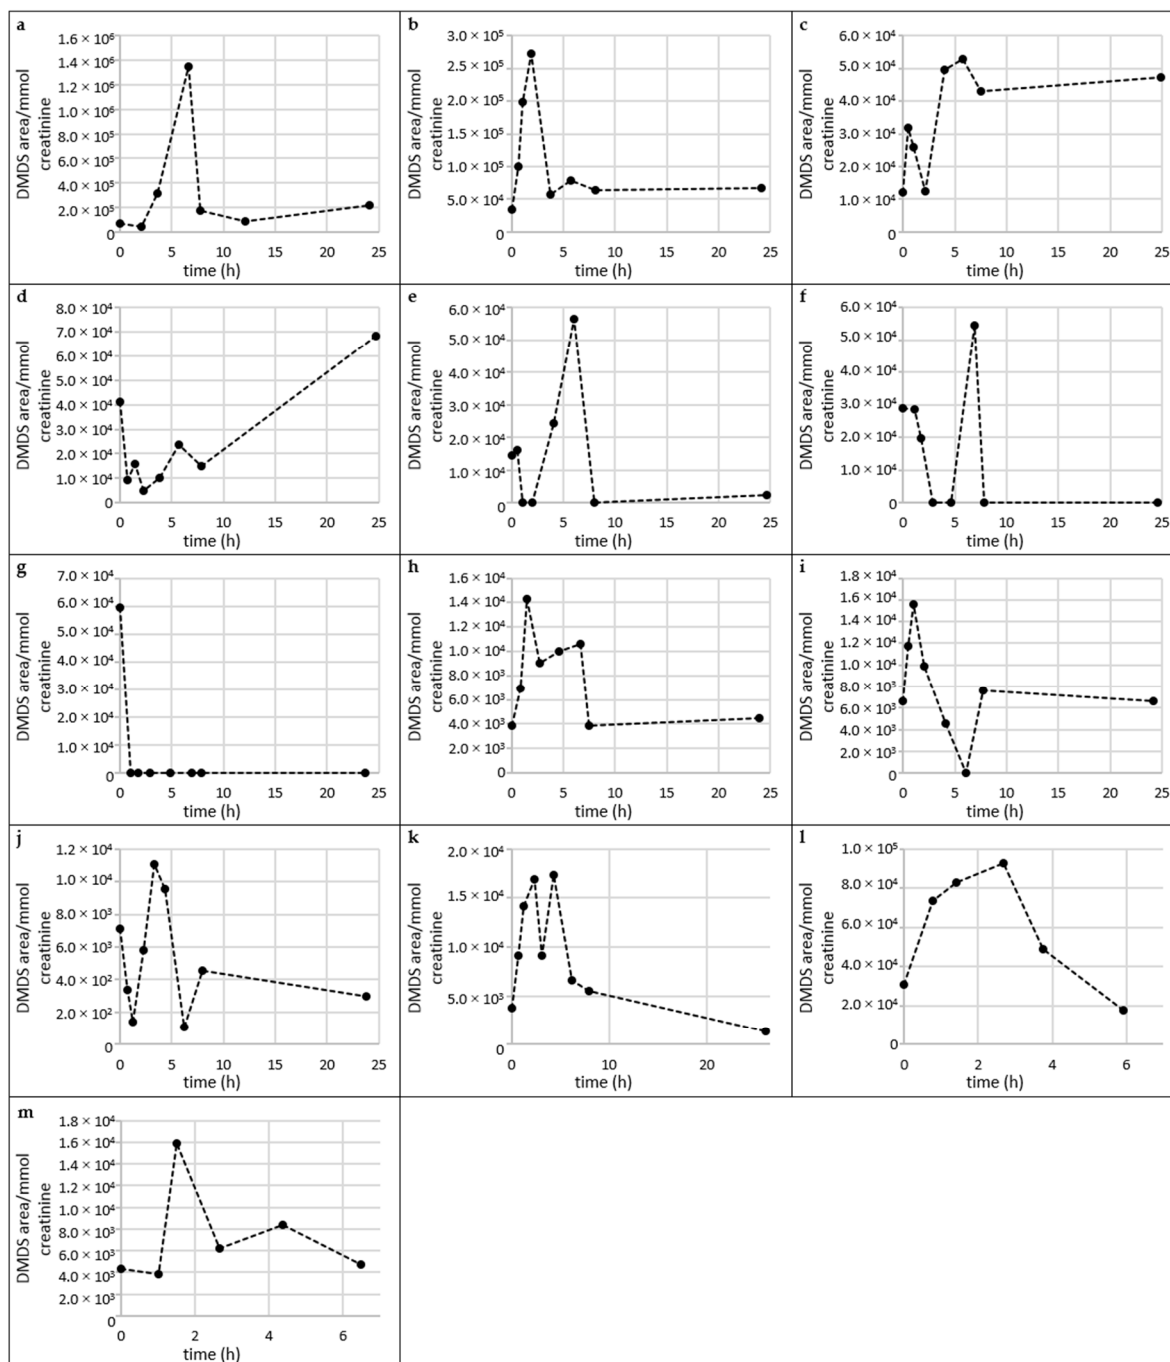

**Figure S4.** Time-resolved profiles of DMSDS-excretion in urine for sets b to n. Time 0 h represents the urine sample collected prior the garlic consumption, following times represent urine samples after garlic consumption. Garlic was consumed 2 to 38 min after the first urine sample was given. (a) set b; (b) set c; (c) set d; (d) set e; (e) set f (f) set g; (g) set h; (h) set i; (i) set j; (j) set k; (k) set l; (l) set m; (m) set n.

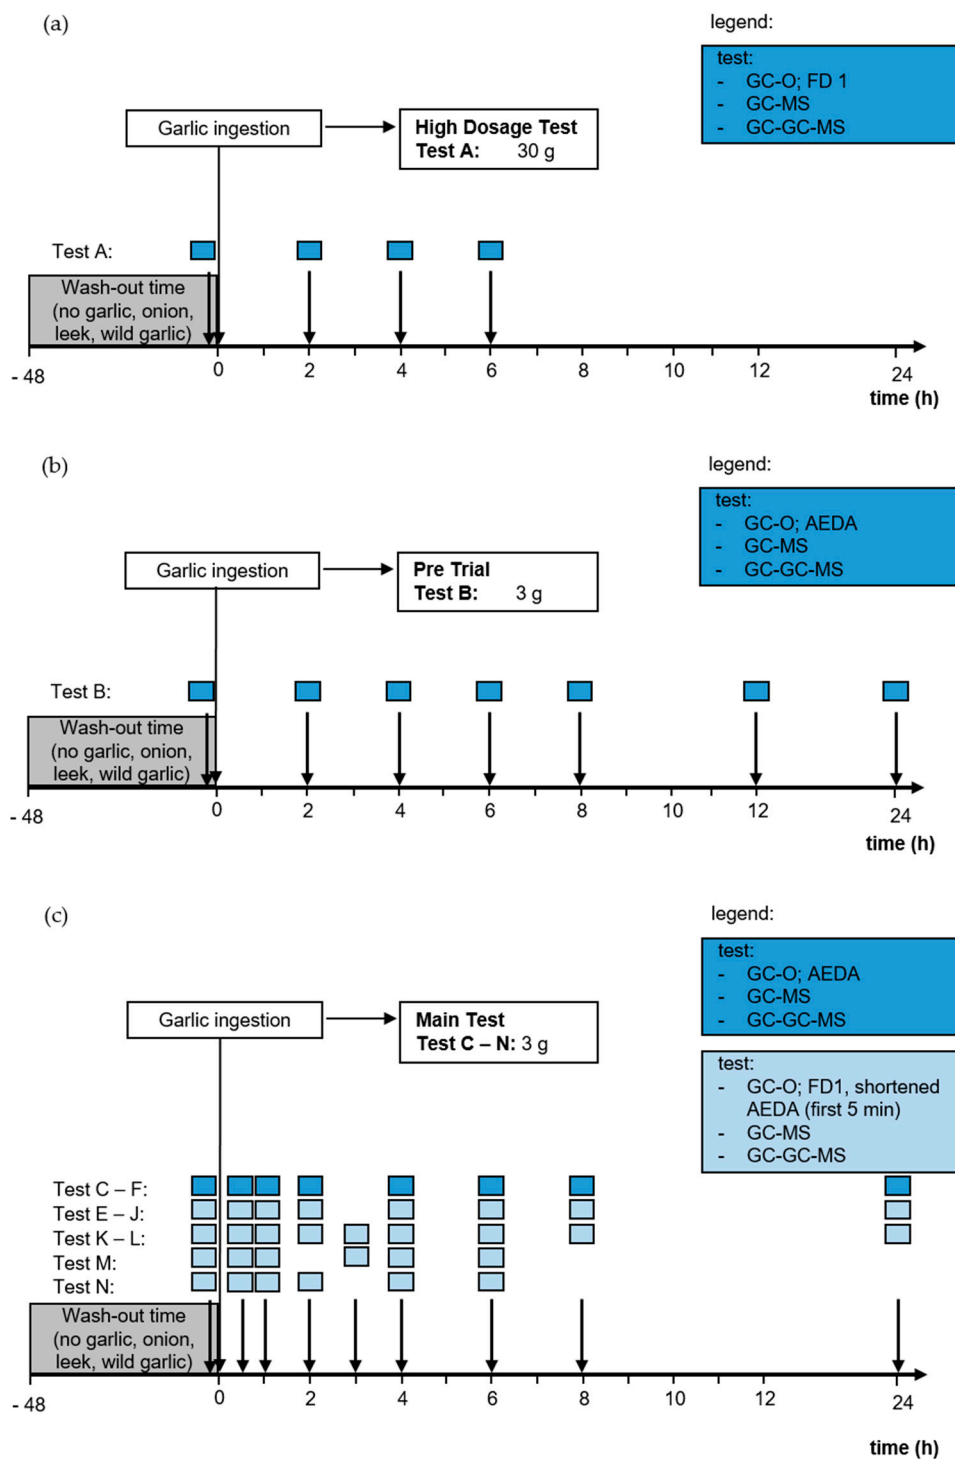

**Figure S5.** Scheme of urine sampling and analytical methods applied for analysis of the respective samples (a) for the high dosage test, (b) for the trial test (c) for the main test.
